# Supplementary material
Source: PubMed Central journal article supplement (PMC5263049)
Supplement: NIHMS825935-supplement-1.pdf [file NIHMS825935-supplement-1.pdf]

**Table S1.** Characteristics of incident Georgia dialysis patients, 2005–2011, overall and by patient referral for kidney transplantation within 1 year of dialysis initiation

| Patient characteristic                                  | Overall       | Referral for kidney transplantation within 1 year of dialysis start |              | P*     |
|---------------------------------------------------------|---------------|---------------------------------------------------------------------|--------------|--------|
|                                                         |               | No                                                                  | Yes          |        |
| <i>N</i> (%)                                            | 12,926 (100%) | 9649 (74.7%)                                                        | 3277 (25.4%) | ---    |
|                                                         |               | <u>Demographic</u>                                                  |              |        |
| Age at dialysis start                                   | 53.5 (11.5)   | 54.8 (11.1)                                                         | 49.5 (11.8)  | <0.001 |
| Female, <i>n</i> (%)                                    | 5883 (45.5%)  | 4510 (46.7%)                                                        | 1373 (41.9%) | <0.001 |
| Race/ethnicity, <i>n</i> (%)                            |               |                                                                     |              | <0.001 |
| Non-Hispanic white                                      | 4094 (31.7%)  | 3285 (34.1%)                                                        | 809 (24.7%)  |        |
| Black                                                   | 8368 (64.8%)  | 6054 (62.8%)                                                        | 2314 (70.6%) |        |
| White Hispanic                                          | 245 (1.9%)    | 172 (1.8%)                                                          | 73 (2.2%)    |        |
| Other                                                   | 214 (1.7%)    | 133 (1.4%)                                                          | 81 (2.5%)    |        |
| Insurance at dialysis start, <i>n</i> (%)               |               |                                                                     |              | <0.001 |
| Private                                                 | 3177 (24.6%)  | 1921 (20.0%)                                                        | 1256 (38.4%) |        |
| Medicare                                                | 2829 (21.9%)  | 2336 (24.3%)                                                        | 493 (15.1%)  |        |
| Medicaid                                                | 3278 (25.4%)  | 2658 (27.6%)                                                        | 620 (18.9%)  |        |
| Other                                                   | 1185 (9.2%)   | 934 (9.7%)                                                          | 251 (7.7%)   |        |
| None                                                    | 2428 (18.8%)  | 1774 (18.4%)                                                        | 654 (20.0%)  |        |
|                                                         |               | <u>Clinical**</u>                                                   |              |        |
| ASCVD, <i>n</i> (%)                                     | 4287 (33.2%)  | 3517 (36.5%)                                                        | 770 (23.5%)  | <0.001 |
| Cancer, <i>n</i> (%)                                    | 635 (4.9%)    | 571 (5.9%)                                                          | 64 (2.0%)    | <0.001 |
| Smoking, <i>n</i> (%)                                   | 1289 (10.0%)  | 1027 (10.7%)                                                        | 262 (8.0%)   | <0.001 |
|                                                         |               | <u>Indicators of quality care</u>                                   |              |        |
| Pre-ESRD nephrology care, <i>n</i> (%)                  | 7108 (60.8%)  | 5242 (60.3%)                                                        | 1866 (62.1%) | 0.09   |
| Starting dialysis on PD, <i>n</i> (%)                   | 916 (7.1%)    | 670 (6.9%)                                                          | 246 (7.5%)   | 0.3    |
| Starting dialysis with a permanent access, <i>n</i> (%) | 4050 (33.8%)  | 2890 (32.2%)                                                        | 1160 (38.3%) | <0.001 |
| On ESA prior to dialysis, <i>n</i> (%)                  | 2414 (22.6%)  | 1825 (23.0%)                                                        | 589 (21.4%)  | 0.08   |
| Informed of transplant option, <i>n</i> (%)             | 9799 (77.5%)  | 7110 (75.2%)                                                        | 2689 (84.4%) | <0.001 |

*N*=12,926 except for race/ethnicity (*N*=12,921), insurance (*N*=12,897), pre-ESRD care (*N*=11,691), ESA prior to dialysis (*N*=10,696), fistula at dialysis initiation (*N*=12,001), and informed of transplant options (*N*=12,641). ASCVD, atherosclerotic cardiovascular disease; ESA, erythropoietin-stimulating agent; ESRD, end stage renal disease; PD peritoneal dialysis.

\**P* by *t* test or chi-square test, as appropriate.

\*\*Provider documentation of presence of condition within 10 years prior to initiating dialysis.
