# Supplementary material
Source: PubMed Central journal article supplement (PMC5263049)
Supplement: NIHMS825935-supplement-2.pdf [file NIHMS825935-supplement-2.pdf]

**Table S2.** Associations of patient referral for kidney transplantation within 1 year of dialysis initiation among Georgia incident dialysis patients (2005–2011) with patient- and facility-level dialysis quality-of-care indicators, among 198 facilities with at least 25 patients.

| Quality indicator                         | Adjusted* odds ratio for referral for kidney transplantation<br>within 1 year of dialysis start |
|-------------------------------------------|-------------------------------------------------------------------------------------------------|
| <u>Patient-level quality indicator</u>    |                                                                                                 |
| Pre-ESRD nephrology care                  | 1.32 (1.16-1.50)                                                                                |
| Starting dialysis on PD                   | ---**                                                                                           |
| Starting dialysis with a permanent access | 1.37 (1.22-1.54)                                                                                |
| ESA prior to dialysis                     | 0.94 (0.81-1.08)                                                                                |
| Informed of transplant option             | 1.67 (1.43-1.95)                                                                                |
| <u>Facility-level quality indicator</u>   |                                                                                                 |
| Standardized transplant ratio             |                                                                                                 |
| Intermediate vs. low                      | 1.14 (0.91-1.44)                                                                                |
| High vs. low                              | 1.23 (0.97-1.55)                                                                                |
| % waitlisted                              |                                                                                                 |
| Intermediate vs. low                      | 1.30 (1.05-1.61)                                                                                |
| High vs. low                              | 1.60 (1.28-2.00)                                                                                |
| Standardized mortality ratio              |                                                                                                 |
| Intermediate vs. low                      | 1.10 (0.87-1.38)                                                                                |
| High vs. low                              | 1.16 (0.91-1.47)                                                                                |
| Standardized hospital admission ratio     |                                                                                                 |
| Intermediate vs. low                      | 0.84 (0.67-1.06)                                                                                |
| High vs. low                              | 0.97 (0.77-1.22)                                                                                |
| % readmitted                              |                                                                                                 |
| Intermediate vs. low                      | 0.82 (0.65-1.03)                                                                                |
| High vs. low                              | 0.97 (0.77-1.23)                                                                                |
| % vaccinated                              |                                                                                                 |
| Intermediate vs. low                      | 0.89 (0.70-1.12)                                                                                |
| High vs. low                              | 1.10 (0.88-1.38)                                                                                |
| % hemoglobin <10 mg/dl                    |                                                                                                 |
| Intermediate vs. low                      | 1.02 (0.81-1.29)                                                                                |
| High vs. low                              | 1.18 (0.94-1.49)                                                                                |
| % Kt/V <1.2                               |                                                                                                 |
| Intermediate vs. low                      | 1.06 (0.85-1.32)                                                                                |
| High vs. low                              | 0.71 (0.57-0.89)                                                                                |
| % URR ≥65 after 183 days                  |                                                                                                 |
| Intermediate vs. low                      | 1.18 (0.93-1.50)                                                                                |
| High vs. low                              | 1.37 (1.10-1.69)                                                                                |
| % with fistula                            |                                                                                                 |
| Intermediate vs. low                      | 1.20 (0.96-1.50)                                                                                |
| High vs. low                              | 1.26 (1.00-1.59)                                                                                |
| % with catheter only at 90 days           |                                                                                                 |
| Intermediate vs. low                      | 1.19 (0.95-1.50)                                                                                |
| High vs. low                              | 1.39 (1.11-1.74)                                                                                |

URR, urea reduction ratio.

\*All models include a random intercept for dialysis facility. Adjusted for age, race/ethnicity, sex, insurance, atherosclerotic cardiovascular disease, cancer, BMI, smoking, pre-ESRD care, PD, permanent access, and informed of transplant option (excluding variables for collinearity).

\*\*Failure predicted perfectly by variable in at least one facility and no estimate given.
